# Supplementary material
Source: publisher figshare collection journal article supplement (https://sage.figshare.com/ndownloader/files/15654005)
Supplement: Supplementary file [file 15654005]

**Food safety and nutrition for low-income urbanites:  
exploring a social justice dilemma in consumption policy**

**Supplementary information**

**S2: FOOD RETAIL CENSUS CHECKLIST**

|                                                                                                                                             |                                                                                                                                     |
|---------------------------------------------------------------------------------------------------------------------------------------------|-------------------------------------------------------------------------------------------------------------------------------------|
| Census no:                                                                                                                                  |                                                                                                                                     |
| Date:                                                                                                                                       | Time:                                                                                                                               |
| <p>Enumerator statement</p> <p>I have finished the census according to the instructions of the project</p> <p>(Signature and full name)</p> | <p>QC statement</p> <p>I have checked this census according to the instructions of the project</p> <p>(Signature and full name)</p> |

|   |                               |                                                                                                                                                                                                                                                                                                                                          |    |                |              |
|---|-------------------------------|------------------------------------------------------------------------------------------------------------------------------------------------------------------------------------------------------------------------------------------------------------------------------------------------------------------------------------------|----|----------------|--------------|
| 1 | District:                     | <input type="checkbox"/> Ba Dinh <input type="checkbox"/> Dong Da                                                                                                                                                                                                                                                                        |    |                |              |
| 2 | Name of shop:                 |                                                                                                                                                                                                                                                                                                                                          |    |                |              |
| 3 | Address:                      | GPS coordinates                                                                                                                                                                                                                                                                                                                          | No | Alley          | Street/ road |
| 4 | Contact details:              | Telephone:                                                                                                                                                                                                                                                                                                                               |    | Email address: |              |
| 5 | Type of shop:                 | <input type="checkbox"/> Hypermarket <input type="checkbox"/> Supermarket <input type="checkbox"/> Convenience store<br><input type="checkbox"/> Mom-and-pop store <input type="checkbox"/> Specialty food shop<br><input type="checkbox"/> Wet market <input type="checkbox"/> Street market <input type="checkbox"/> street food stall |    |                |              |
| 6 | Shop operational since:       | <input type="checkbox"/> < 1 year <input type="checkbox"/> 1-2 years <input type="checkbox"/> 3-5 years <input type="checkbox"/> > 5 years                                                                                                                                                                                               |    |                |              |
| 7 | Ultra-processed foods offered | <input type="checkbox"/> No<br><input type="checkbox"/> Yes: .....% of total food assortment                                                                                                                                                                                                                                             |    |                |              |
| 8 | Ready-to-eat foods offered    | <input type="checkbox"/> No<br><input type="checkbox"/> Yes                                                                                                                                                                                                                                                                              |    |                |              |

| 9  | Food group                      | Examples                                                                                                                                                                                             | Whole or minimal processed   | Ultra processed              |
|----|---------------------------------|------------------------------------------------------------------------------------------------------------------------------------------------------------------------------------------------------|------------------------------|------------------------------|
| 1  | CEREALS                         | bread, noodles, biscuits, cookies or any other foods made from millet, sorghum, maize, rice, wheat + insert local foods available grains, porridge or pastes or other locally available cereal foods | <input type="checkbox"/> Yes | <input type="checkbox"/> Yes |
| 2  | WHITE TUBERS AND ROOTS          | white potatoes, white yams, cassava, or foods made from roots                                                                                                                                        | <input type="checkbox"/> Yes | <input type="checkbox"/> Yes |
| 3  | VITAMIN A RICH VEGETABLES       | pumpkin, squash, & other locally available vitamin-A rich vegetables, particularly that are orange inside (e.g. sweet pepper)                                                                        | <input type="checkbox"/> Yes | <input type="checkbox"/> Yes |
| 4  | VITAMIN A RICH ROOTS AND TUBERS | carrots, sweet potatoes that are orange inside                                                                                                                                                       | <input type="checkbox"/> Yes | <input type="checkbox"/> Yes |
| 5  | DARK GREEN LEAFY VEGETABLES     | dark green/leafy vegetables, including wild ones + <i>locally available vitamin-A rich leaves such as cassava leaves etc.</i>                                                                        | <input type="checkbox"/> Yes | <input type="checkbox"/> Yes |
| 6  | OTHER VEGETABLES                | other vegetables (e.g. tomato, onion, eggplant) , including wild vegetables                                                                                                                          | <input type="checkbox"/> Yes | <input type="checkbox"/> Yes |
| 7  | VITAMIN A RICH FRUITS           | ripe mangoes, cantaloupe, dried apricots, dried peaches + other locally available vitamin A-rich fruits                                                                                              | <input type="checkbox"/> Yes | <input type="checkbox"/> Yes |
| 8  | OTHER FRUITS                    | other fruits, including wild fruits                                                                                                                                                                  | <input type="checkbox"/> Yes | <input type="checkbox"/> Yes |
| 9  | ORGAN MEAT (IRONRICH)           | liver, kidney, heart or other organ meats or blood-based foods                                                                                                                                       | <input type="checkbox"/> Yes | <input type="checkbox"/> Yes |
| 10 | FLESH MEATS                     | beef, pork, lamb, goat, rabbit, wild game, chicken, duck, or other birds                                                                                                                             | <input type="checkbox"/> Yes | <input type="checkbox"/> Yes |
| 11 | FISH                            | fresh or dried fish or shellfish                                                                                                                                                                     | <input type="checkbox"/> Yes | <input type="checkbox"/> Yes |
| 12 | INSECTS                         | termites, grass-hoppers, silk worm, larvae                                                                                                                                                           | <input type="checkbox"/> Yes | <input type="checkbox"/> Yes |
| 13 | EGGS                            | any eggs                                                                                                                                                                                             | <input type="checkbox"/> Yes | <input type="checkbox"/> Yes |
| 14 | MILK AND MILK PRODUCTS          | milk, cheese, yoghurt or other milk products                                                                                                                                                         | <input type="checkbox"/> Yes | <input type="checkbox"/> Yes |
| 15 | NUTS AND SEEDS                  | nuts, seeds or foods made from these                                                                                                                                                                 | <input type="checkbox"/> Yes | <input type="checkbox"/> Yes |
| 16 | LEGUMES                         | beans, peas, lentils or food made from these                                                                                                                                                         | <input type="checkbox"/> Yes | <input type="checkbox"/> Yes |
| 17 | OILS AND FATS                   | oil, fats or butter added to food                                                                                                                                                                    | <input type="checkbox"/> Yes | <input type="checkbox"/> Yes |

|    |                                     |                                                                                                                    |                              |                              |
|----|-------------------------------------|--------------------------------------------------------------------------------------------------------------------|------------------------------|------------------------------|
|    |                                     | or used for cooking                                                                                                |                              |                              |
| 18 | SWEETS                              | sugar, honey, sweetened soda or sugary foods such as chocolates, sweets or candies                                 | <input type="checkbox"/> Yes | <input type="checkbox"/> Yes |
| 19 | SPICES,<br>CONDIMENTS,<br>BEVERAGES | spices (black pepper, salt), condiments (soy sauce, hot sauce), coffee, tea, alcoholic beverages OR local examples |                              |                              |

**Continue with Section D - questions Q11 and 12 - only for outlets that sell fresh vegetables, if not, STOP.**

|           |                                                                                                                                           |                                                             |                                                                                                                                                   |                                                                                                                                                                                                     |                                                                                                                                                                                     |
|-----------|-------------------------------------------------------------------------------------------------------------------------------------------|-------------------------------------------------------------|---------------------------------------------------------------------------------------------------------------------------------------------------|-----------------------------------------------------------------------------------------------------------------------------------------------------------------------------------------------------|-------------------------------------------------------------------------------------------------------------------------------------------------------------------------------------|
| <b>10</b> | Shop level food safety claim<br>(billboard/signboard <u>OUTSIDE</u> )                                                                     | <input type="checkbox"/> No<br><input type="checkbox"/> Yes | <input type="checkbox"/> Certification<br><input type="checkbox"/> VietGAP<br><input type="checkbox"/> PGS<br><input type="checkbox"/> Other: ... | <input type="checkbox"/> Informal claim:<br><input type="checkbox"/> Rau An Toan<br><input type="checkbox"/> Rau Sach<br><input type="checkbox"/> Rau Huu Co<br><input type="checkbox"/> Other: ... | <input type="checkbox"/> Other communication<br><input type="checkbox"/> Origin info<br><input type="checkbox"/> Marketing health<br><input type="checkbox"/> Marketing food safety |
| <b>11</b> | Fresh vegetable category food safety claim (billboard/signboard <u>INSIDE</u> the outlet for total category, around or on category shelf) | <input type="checkbox"/> No<br><input type="checkbox"/> Yes | <input type="checkbox"/> Certification<br><input type="checkbox"/> VietGAP<br><input type="checkbox"/> PGS<br><input type="checkbox"/> Other: ... | <input type="checkbox"/> Informal claim:<br><input type="checkbox"/> Rau An Toan<br><input type="checkbox"/> Rau Sach<br><input type="checkbox"/> Rau Huu Co<br><input type="checkbox"/> Other: ... | <input type="checkbox"/> Other communication<br><input type="checkbox"/> Origin info<br><input type="checkbox"/> Marketing health<br><input type="checkbox"/> Marketing food safety |

| <b>12</b> | <b>Fresh Vegetables</b>   | <b>Check box of foods offered</b>                                                                                                                            | <b>Food safety claim</b>                                                                           |                                                                                       | <b>List food safety claims/labels/brands observed (multiple answers possible)</b>                                                                                                        |
|-----------|---------------------------|--------------------------------------------------------------------------------------------------------------------------------------------------------------|----------------------------------------------------------------------------------------------------|---------------------------------------------------------------------------------------|------------------------------------------------------------------------------------------------------------------------------------------------------------------------------------------|
| 1         | WHITE TUBERS AND ROOTS    | <input type="checkbox"/> Potato<br><input type="checkbox"/> Kohlrabi<br><input type="checkbox"/> sweet potato (white)<br><input type="checkbox"/> Other: ... | <input type="checkbox"/> Yes all<br><input type="checkbox"/> Some<br><input type="checkbox"/> None | <input type="checkbox"/> Formal certification                                         | <input type="checkbox"/> VietGAP<br><input type="checkbox"/> PGS<br><input type="checkbox"/> Other: ...                                                                                  |
| 2         | VITAMIN A RICH VEGETABLES | <input type="checkbox"/> Pumpkin<br><input type="checkbox"/> Red Capsicum/Bell pepper<br><input type="checkbox"/> Other: ...                                 | <input type="checkbox"/> Yes all<br><input type="checkbox"/> Some<br><input type="checkbox"/> None | <input type="checkbox"/> Certification<br><br><input type="checkbox"/> Informal claim | <input type="checkbox"/> VietGAP<br><input type="checkbox"/> PGS<br><input type="checkbox"/> Other: ...<br><br><input type="checkbox"/> Rau An Toan<br><input type="checkbox"/> Rau Sach |

|   |                       |                                                                                                                           |                                                                                                    |                                              |                                                                                                                                                         |
|---|-----------------------|---------------------------------------------------------------------------------------------------------------------------|----------------------------------------------------------------------------------------------------|----------------------------------------------|---------------------------------------------------------------------------------------------------------------------------------------------------------|
|   |                       |                                                                                                                           |                                                                                                    |                                              | <input type="checkbox"/> Rau Huu Co<br><input type="checkbox"/> Other: ...                                                                              |
|   |                       |                                                                                                                           |                                                                                                    | <input type="checkbox"/> Branding            | <input type="checkbox"/> Retail brand<br><input type="checkbox"/> Producer brand                                                                        |
|   |                       |                                                                                                                           |                                                                                                    | <input type="checkbox"/> Other communication | <input type="checkbox"/> Origin info<br><input type="checkbox"/> Marketing on health<br><input type="checkbox"/> Marketing on food safety               |
| 3 | VITAMIN A RICH TUBERS | <input type="checkbox"/> Carrots<br><input type="checkbox"/> Sweet potato (orange)<br><input type="checkbox"/> Other: ... | <input type="checkbox"/> Yes all<br><input type="checkbox"/> Some<br><input type="checkbox"/> None | <input type="checkbox"/> Certification       | <input type="checkbox"/> VietGAP<br><input type="checkbox"/> PGS<br><input type="checkbox"/> Other: ...                                                 |
|   |                       |                                                                                                                           |                                                                                                    | <input type="checkbox"/> Informal claim      | <input type="checkbox"/> Rau An Toan<br><input type="checkbox"/> Rau Sach<br><input type="checkbox"/> Rau Huu Co<br><input type="checkbox"/> Other: ... |
|   |                       |                                                                                                                           |                                                                                                    | <input type="checkbox"/> Branding            | <input type="checkbox"/> Retail brand<br><input type="checkbox"/> Producer brand                                                                        |
|   |                       |                                                                                                                           |                                                                                                    | <input type="checkbox"/> Other communication | <input type="checkbox"/> Origin info<br><input type="checkbox"/> Marketing on health<br><input type="checkbox"/> Marketing on food safety               |
|   |                       |                                                                                                                           |                                                                                                    | <input type="checkbox"/> Informal claim      | <input type="checkbox"/> Rau An Toan<br><input type="checkbox"/> Rau Sach<br><input type="checkbox"/> Rau Huu Co<br><input type="checkbox"/> Other: ... |

|   |                             |                                                                                                                                                                                                                                                                                                                                                                                                                                                         |                                                                                                    |                                              |                                                                                                                                                         |
|---|-----------------------------|---------------------------------------------------------------------------------------------------------------------------------------------------------------------------------------------------------------------------------------------------------------------------------------------------------------------------------------------------------------------------------------------------------------------------------------------------------|----------------------------------------------------------------------------------------------------|----------------------------------------------|---------------------------------------------------------------------------------------------------------------------------------------------------------|
|   |                             |                                                                                                                                                                                                                                                                                                                                                                                                                                                         |                                                                                                    | <input type="checkbox"/> Branding            | <input type="checkbox"/> Retail brand<br><input type="checkbox"/> Producer brand                                                                        |
|   |                             |                                                                                                                                                                                                                                                                                                                                                                                                                                                         |                                                                                                    | <input type="checkbox"/> Other communication | <input type="checkbox"/> Origin info<br><input type="checkbox"/> Marketing on health<br><input type="checkbox"/> Marketing on food safety               |
| 4 | DARK GREEN LEAFY VEGETABLES | <input type="checkbox"/> Morning glory<br><input type="checkbox"/> Cos Lettuce or dark green lettuce<br><input type="checkbox"/> Mustard leaves<br><input type="checkbox"/> Pakchoy<br><input type="checkbox"/> Pumpkin leaves<br><input type="checkbox"/> Sweet potatoe leaves<br><input type="checkbox"/> Spinach<br><input type="checkbox"/> Cai Lan (collards)<br><input type="checkbox"/> Broccoli<br><input type="checkbox"/> Other: (record) ... | <input type="checkbox"/> Yes all<br><input type="checkbox"/> Some<br><input type="checkbox"/> None | <input type="checkbox"/> Certification       | <input type="checkbox"/> VietGAP<br><input type="checkbox"/> PGS<br><input type="checkbox"/> Other: ...                                                 |
|   |                             |                                                                                                                                                                                                                                                                                                                                                                                                                                                         |                                                                                                    | <input type="checkbox"/> Informal claim      | <input type="checkbox"/> Rau An Toan<br><input type="checkbox"/> Rau Sach<br><input type="checkbox"/> Rau Huu Co<br><input type="checkbox"/> Other: ... |
|   |                             |                                                                                                                                                                                                                                                                                                                                                                                                                                                         |                                                                                                    | <input type="checkbox"/> Branding            | <input type="checkbox"/> Retail brand<br><input type="checkbox"/> Producer brand                                                                        |
|   |                             |                                                                                                                                                                                                                                                                                                                                                                                                                                                         |                                                                                                    | <input type="checkbox"/> Other communication | <input type="checkbox"/> Origin info<br><input type="checkbox"/> Marketing on health<br><input type="checkbox"/> Marketing on food safety               |
| 5 | OTHER VEGETABLES            | <input type="checkbox"/> Tomato<br><input type="checkbox"/> Onion<br><input type="checkbox"/> Eggplant<br><input type="checkbox"/> Zucchini<br><input type="checkbox"/> Corn<br><input type="checkbox"/> Green or yellow                                                                                                                                                                                                                                | <input type="checkbox"/> Yes all<br><input type="checkbox"/> Some<br><input type="checkbox"/> None | <input type="checkbox"/> Certification       | <input type="checkbox"/> VietGAP<br><input type="checkbox"/> PGS<br><input type="checkbox"/> Other: ...                                                 |
|   |                             |                                                                                                                                                                                                                                                                                                                                                                                                                                                         |                                                                                                    | <input type="checkbox"/> Informal claim      | <input type="checkbox"/> Rau An Toan<br><input type="checkbox"/> Rau Sach<br><input type="checkbox"/> Rau Huu Co                                        |

|  |  |                                                                                                                                                                                                                                                                                                                                                                                                                                                                                                                                                                                                                                |  |                                              |                                                                                                                                           |
|--|--|--------------------------------------------------------------------------------------------------------------------------------------------------------------------------------------------------------------------------------------------------------------------------------------------------------------------------------------------------------------------------------------------------------------------------------------------------------------------------------------------------------------------------------------------------------------------------------------------------------------------------------|--|----------------------------------------------|-------------------------------------------------------------------------------------------------------------------------------------------|
|  |  | capsicum<br><input type="checkbox"/> Cauliflower<br><input type="checkbox"/> White Cabbage<br>Red/purple Cabbage<br><input type="checkbox"/> Light green lettuce<br><input type="checkbox"/> Bamboo shoots<br><input type="checkbox"/> Bitter Melon<br><input type="checkbox"/> Chayote<br><input type="checkbox"/> Cucumber<br><input type="checkbox"/> Winter melon<br><input type="checkbox"/> Bitter gourd<br><input type="checkbox"/> Ceylon spinach<br><input type="checkbox"/> Beans, list types: ...<br><br><input type="checkbox"/> Mushrooms, list types:<br>...<br><br><input type="checkbox"/> Other: (record) ... |  |                                              | <input type="checkbox"/> Other: ...                                                                                                       |
|  |  |                                                                                                                                                                                                                                                                                                                                                                                                                                                                                                                                                                                                                                |  | <input type="checkbox"/> Branding            | <input type="checkbox"/> Retail brand<br><input type="checkbox"/> Producer brand                                                          |
|  |  |                                                                                                                                                                                                                                                                                                                                                                                                                                                                                                                                                                                                                                |  | <input type="checkbox"/> Other communication | <input type="checkbox"/> Origin info<br><input type="checkbox"/> Marketing on health<br><input type="checkbox"/> Marketing on food safety |
